# Supplementary material for: Investigation of adsorption properties of CS2 on interior and exterior surfaces of single-walled silicon-carbide nanotubes and effect of applied electric field: electronic structure, charge density and NMR studies
Source: Royal Society of Chemistry journal article supplement (doi:10.1039/c5ra06459g), 2015-01-01
Supplement: c5ra06459g1.pdf [file c5ra06459g1.pdf]

**Table S1** The geometrical parameters (bond lengths (R) is in Å), adsorption ( $E_{ad}$ ) calculated at the B3LYP-D/6-31G\* level

|                  | $R_{C-Si}$                     | $R_{CS2...nanotube}$              | $R_{C-S}$                        | $E_{ad}$ |
|------------------|--------------------------------|-----------------------------------|----------------------------------|----------|
| Configuration 1  | C1-Si2=1.812<br>C1-Si6=1.785   | Si2...S18=3.446                   | C17-S19=1.561<br>C17-S18=1.561   | -30.29   |
| Configuration 2  | C1-Si2=1.941<br>C1-Si6=1.901   | C1...C17=1.486<br>Si2...S18=2.401 | C17-S19=1.741<br>C17-S18=1.695   | -604.201 |
| Configuration 3  | C1-Si2=1.787<br>C1-Si6=1.847   | Si6...S18=2.260                   | C17-S19=1.575<br>C17-S18=1.666   | 57.117   |
| Configuration 4  | C1-Si2=1.814<br>Si2-C10=1.782  | S18...C=3.376<br>S19...C13=3.952  | C17-S19=1.553<br>C17-S18=1.598   | 5.468    |
| Configuration 5  | C1-Si2=1.973<br>C1-Si6=1.947   | C1...C17=1.476<br>Si6...S19=2.289 | C17-S19=1.729<br>C17-S18=1.710   | -24.172  |
| Configuration 6  | C1-Si2=1.853<br>C3-Si2=1.998   | Si2...C17=1.926<br>C3...S18=1.879 | C17-S19=1.625<br>C17-S18=1.793   | -458.44  |
| Configuration 7  | C1-Si2=1.814<br>C1-Si6=1.786   | C1...S19= 4.657                   | C17-S19= 1.598<br>C17-S18= 1.553 | 5.463    |
| Configuration 8  | C1-Si2=1.810<br>Si2-C3=1.786   | Si2...S17=3.601                   | C17-S19=1.565<br>C17-S18=1.560   | 9.603    |
| Configuration 9  | C1-Si2= 1.901<br>Si6-C1= 1.936 | S19...C1=1.835                    | C17-S19= 1.659<br>C17-S18= 1.739 | 932.106  |
| Configuration 10 | C1-Si2= 1.804                  | S18...Si2= 3.025                  | C17-S19= 1.544<br>C17-S18= 1.573 | 329.207  |

**Table S2** The geometrical parameters (bond lengths (R) is in Å), adsorption ( $E_{ad}$ ) calculated at the CAM-B3LYP /6-31G\* level

|                  | $R_{C-Si}$                        | $R_{CS2...nanotube}$               | $R_{C-S}$                        | $E_{ad}$ |
|------------------|-----------------------------------|------------------------------------|----------------------------------|----------|
| Configuration 1  | C4-Si5=1.834<br>C5-Si6=1.764      | C5...S18=3.723                     | C17-S19=1.556<br>C17-S18=1.556   | -25.39   |
| Configuration 2  | C5-Si4= 1.949<br>C5-Si6=1.886     | C5...C17=1.484<br>Si4...S18=2.424  | C17-S19=1.736<br>C17-S18= 1.672  | -172.853 |
| Configuration 3  | C1-Si2=1.776<br>C1-Si6=1.843      | Si6...S18=2.219                    | C17-S19=1.598<br>C17-S18=1.669   | 11.04    |
| Configuration 4  | C1-Si2=1.829<br>Si2-C10=1.766     | S19...C10=4.070<br>C17...Si7=4.033 | C17-S19=1.556<br>C17-S18=1.553   | -2.662   |
| Configuration 5  | C1-Si2=1.980<br>C1-Si6=1.941      | C1...C17=1.477<br>Si6...S19=2.238  | C17-S19=1.731<br>C17-S18=1.677   | -50.37   |
| Configuration 6  | C1-Si2=1.865<br>C3-Si2=1.980      | Si2...C17=1.919<br>C3...S18=1.856  | C17-S19=1.615<br>C17-S18=1.776   | -29.75   |
| Configuration 7  | Si6-C11= 1.826<br>C11-Si20= 1.779 | S19-Si20=2.677                     | C17-S19=1.578<br>C17-S18=1.532   | -10.43   |
| Configuration 8  | C1-Si2= 1.831<br>Si2-C3=1.764     | C3...S18= 4.105                    | C17-S19=1.560<br>C17-S18=1.551   | -3.935   |
| Configuration 9  | C5-Si4=1.908<br>Si6-C5= 1.918     | S19...C5=1.809                     | C17-S19=1.776<br>C17-S18=1.836   | 890.625  |
| Configuration 10 | C1-Si7= 1.785                     | S18...Si7=3.082                    | C17-S19= 1.517<br>C17-S18= 1.587 | 320.99   |

**Table S3** energy of the highest occupied molecular orbital ( $E_{\text{HOMO}}$ ), energy of the lowest unoccupied molecular orbital ( $E_{\text{LUMO}}$ ), the molecular orbital energy gap,  $E_g$ , Chemical hardness ( $\eta$ ) and chemical potential ( $\mu$ ), Fermi level energy and work function ( $\Phi$ ) in terms of eV computed at B3LYP-D

|             | $E_{\text{HOMO}}$ | $E_{\text{LUMO}}$ | $E_g$    | $\eta$   | $\mu$    | $E_{\text{FL}}$ | $\Phi$   |
|-------------|-------------------|-------------------|----------|----------|----------|-----------------|----------|
| Configure1  | -4.24075          | -3.8738           | 0.36690  | 0.183460 | -4.05729 | -4.05729        | 4.05729  |
| Configure2  | -4.16949          | -3.81643          | 0.353056 | 0.176528 | -3.99296 | -3.99296        | 3.99296  |
| Configure3  | -4.2179           | -3.85941          | 0.358496 | 0.179248 | -4.03866 | -4.03866        | 4.038656 |
| Configure4  | -4.12597          | -3.78814          | 0.337824 | 0.168912 | -3.95706 | -3.95706        | 3.957056 |
| Configure5  | -4.21355          | -3.85886          | 0.354688 | 0.177344 | -4.03621 | -4.03621        | 4.036208 |
| Configure6  | -4.31582          | -3.95787          | 0.357952 | 0.178976 | -4.13685 | -4.13685        | 4.136848 |
| Configure7  | -4.12597          | -3.78814          | 0.337824 | 0.168912 | -3.95706 | -3.95706        | 3.957056 |
| Configure8  | -4.19098          | -3.82269          | 0.368288 | 0.184144 | -4.00683 | -4.00683        | 4.006832 |
| Configure9  | -4.57803          | -4.16269          | 0.415344 | 0.207672 | -4.37036 | -4.37036        | 4.37036  |
| Configure10 | -4.33541          | -3.96086          | 0.374544 | 0.187272 | -4.14814 | -4.14814        | 4.148136 |

**Table S4** energy of the highest occupied molecular orbital ( $E_{\text{HOMO}}$ ), energy of the lowest unoccupied molecular orbital ( $E_{\text{LUMO}}$ ), the molecular orbital energy gap,  $E_g$ , Chemical hardness ( $\eta$ ) and chemical potential ( $\mu$ ), Fermi level energy and work function ( $\Phi$ ) in terms of eV computed at CAM-B3LYP

|             | $E_{\text{HOMO}}$ | $E_{\text{LUMO}}$ | $E_g$   | $\eta$  | $\mu$   | $E_{\text{FL}}$ | $\Phi$ |
|-------------|-------------------|-------------------|---------|---------|---------|-----------------|--------|
| SiCNT       | -4.9865           | -3.0507           | 1.9358  | 0.9679  | -4.0186 | -4.0186         | 4.0186 |
| Configure1  | -4.5247           | -3.34043          | 1.18428 | 0.59214 | -3.9325 | -3.9325         | 3.9325 |
| Configure2  | -5.071            | -2.9387           | 2.1327  | 1.0663  | -4.0050 | -4.0050         | 4.0050 |
| Configure3  | -5.3769           | -2.8685           | 2.5084  | 1.2542  | -4.1227 | -4.1227         | 4.1227 |
| Configure4  | -4.9871           | -3.0319           | 1.9551  | 0.9776  | -4.0095 | -4.0095         | 4.0095 |
| Configure5  | -4.9795           | -3.0540           | 1.9255  | 0.9627  | -4.0167 | -4.0167         | 4.0167 |
| Configure6  | -5.2085           | -3.0910           | 2.1175  | 1.0587  | -4.1497 | -4.1497         | 4.1497 |
| Configure7  | -4.8875           | -2.9716           | 1.9159  | 0.9579  | -3.9295 | -3.9295         | 3.9295 |
| Configure8  | -5.0377           | -3.0665           | 1.9712  | 0.9856  | -4.0521 | -4.0521         | 4.0521 |
| Configure9  | -5.4084           | -3.0567           | 2.3517  | 1.1758  | -4.2356 | -4.2356         | 4.2356 |
| Configure10 | -5.0652           | -3.1609           | 1.9043  | 0.9521  | -4.1130 | -4.1130         | 4.1130 |

**Table S5** The geometrical parameters (bond lengths (R) is in Å), adsorption ( $E_{ad}$ ) calculated at the CAM-B3LYP-D/6-31G\* level

|                 | SiCNT(7,0) | SiCNT (6,0) | CS <sub>2</sub> -(7,0)SiCNT | CS <sub>2</sub> -(6,0)SiCNT |
|-----------------|------------|-------------|-----------------------------|-----------------------------|
| C2-Si1          | 1.82546    | 1.77797     | 1.82392                     | 1.80065                     |
| C8-Si7          | 1.82326    | 1.77742     | 1.82268                     | 1.79939                     |
| C14-Si9         | 1.82409    | 1.77927     | 1.82372                     | 1.80074                     |
| C6-Si5          | 1.76341    | 1.78844     | 1.76409                     | 1.77632                     |
| C4-Si3          | 1.76503    | 1.78819     | 1.76553                     | 1.77734                     |
| C10-Si11        | 1.76527    | 1.78961     | 1.76545                     | 1.77845                     |
| C12-Si13        | 1.76390    | 1.78904     | 1.76427                     | 1.77763                     |
| C=S             | .....      | .....       | 1.5504                      | 1.55293                     |
| E <sub>ad</sub> |            |             | -25.1225                    | -27.0306                    |

**Table S1** The geometrical parameters (bond lengths (R) is in Å), adsorption ( $E_{ad}$ ) calculated at the B3LYP-D/6-31G\* level

|                 | R <sub>C-Si</sub>             | R <sub>CS<sub>2</sub>...nanotube</sub> | R <sub>C-S</sub>               | E <sub>ad</sub> |
|-----------------|-------------------------------|----------------------------------------|--------------------------------|-----------------|
| Configuration 1 | C1-Si2=1.812<br>C1-Si6=1.785  | Si2...S18=3.446                        | C17-S19=1.561<br>C17-S18=1.561 | -30.29          |
| Configuration 2 | C1-Si2=1.941<br>C1-Si6=1.901  | C1...C17=1.486<br>Si2...S18=2.401      | C17-S19=1.741<br>C17-S18=1.695 | -604.201        |
| Configuration 3 | C1-Si2=1.787<br>C1-Si6=1.847  | Si6...S18=2.260                        | C17-S19=1.575<br>C17-S18=1.666 | 57.117          |
| Configuration 4 | C1-Si2=1.814<br>Si2-C10=1.782 | S18...C=3.376<br>S19...C13=3.952       | C17-S19=1.553<br>C17-S18=1.598 | 5.468           |
| Configuration 5 | C1-Si2=1.973<br>C1-Si6=1.947  | C1...C17=1.476<br>Si6...S19=2.289      | C17-S19=1.729<br>C17-S18=1.710 | -24.172         |
| Configuration 6 | C1-Si2=1.853<br>C3-Si2=1.998  | Si2...C17=1.926<br>C3...S18=1.879      | C17-S19=1.625<br>C17-S18=1.793 | -458.44         |

---

|                  |                                |                  |                                  |         |
|------------------|--------------------------------|------------------|----------------------------------|---------|
| Configuration 7  | C1-Si2=1.814<br>C1-Si6=1.786   | C1...S19= 4.657  | C17-S19= 1.598<br>C17-S18= 1.553 | 5.463   |
| Configuration 8  | C1-Si2=1.810<br>Si2-C3=1.786   | Si2...S17=3.601  | C17-S19=1.565<br>C17-S18=1.560   | 9.603   |
| Configuration 9  | C1-Si2= 1.901<br>Si6-C1= 1.936 | S19...C1=1.835   | C17-S19= 1.659<br>C17-S18= 1.739 | 932.106 |
| Configuration 10 | C1-Si2= 1.804                  | S18...Si2= 3.025 | C17-S19= 1.544<br>C17-S18= 1.573 | 329.207 |

---

**Table S2** The geometrical parameters (bond lengths (R) is in Å), adsorption ( $E_{ad}$ ) calculated at the CAM-B3LYP /6-31G\* level

|                  | $R_{C-Si}$                        | $R_{CS2...nanotube}$               | $R_{C-S}$                        | $E_{ad}$ |
|------------------|-----------------------------------|------------------------------------|----------------------------------|----------|
| Configuration 1  | C4-Si5=1.834<br>C5-Si6=1.764      | C5...S18=3.723                     | C17-S19=1.556<br>C17-S18=1.556   | -25.39   |
| Configuration 2  | C5-Si4= 1.949<br>C5-Si6=1.886     | C5...C17=1.484<br>Si4...S18=2.424  | C17-S19=1.736<br>C17-S18= 1.672  | -172.853 |
| Configuration 3  | C1-Si2=1.776<br>C1-Si6=1.843      | Si6...S18=2.219                    | C17-S19=1.598<br>C17-S18=1.669   | 11.04    |
| Configuration 4  | C1-Si2=1.829<br>Si2-C10=1.766     | S19...C10=4.070<br>C17...Si7=4.033 | C17-S19=1.556<br>C17-S18=1.553   | -2.662   |
| Configuration 5  | C1-Si2=1.980<br>C1-Si6=1.941      | C1...C17=1.477<br>Si6...S19=2.238  | C17-S19=1.731<br>C17-S18=1.677   | -50.37   |
| Configuration 6  | C1-Si2=1.865<br>C3-Si2=1.980      | Si2...C17=1.919<br>C3...S18=1.856  | C17-S19=1.615<br>C17-S18=1.776   | -29.75   |
| Configuration 7  | Si6-C11= 1.826<br>C11-Si20= 1.779 | S19-Si20=2.677                     | C17-S19=1.578<br>C17-S18=1.532   | -10.43   |
| Configuration 8  | C1-Si2= 1.831<br>Si2-C3=1.764     | C3...S18= 4.105                    | C17-S19=1.560<br>C17-S18=1.551   | -3.935   |
| Configuration 9  | C5-Si4=1.908<br>Si6-C5= 1.918     | S19...C5=1.809                     | C17-S19=1.776<br>C17-S18=1.836   | 890.625  |
| Configuration 10 | C1-Si7= 1.785                     | S18...Si7=3.082                    | C17-S19= 1.517<br>C17-S18= 1.587 | 320.99   |

**Table S3** energy of the highest occupied molecular orbital ( $E_{\text{HOMO}}$ ), energy of the lowest unoccupied molecular orbital ( $E_{\text{LUMO}}$ ), the molecular orbital energy gap,  $E_g$ , Chemical hardness ( $\eta$ ) and chemical potential ( $\mu$ ), Fermi level energy and work function ( $\Phi$ ) in terms of eV computed at B3LYP-D

|             | $E_{\text{HOMO}}$ | $E_{\text{LUMO}}$ | $E_g$    | $\eta$   | $\mu$    | $E_{\text{FL}}$ | $\Phi$   |
|-------------|-------------------|-------------------|----------|----------|----------|-----------------|----------|
| Configure1  | -4.24075          | -3.8738           | 0.36690  | 0.183460 | -4.05729 | -4.05729        | 4.05729  |
| Configure2  | -4.16949          | -3.81643          | 0.353056 | 0.176528 | -3.99296 | -3.99296        | 3.99296  |
| Configure3  | -4.2179           | -3.85941          | 0.358496 | 0.179248 | -4.03866 | -4.03866        | 4.038656 |
| Configure4  | -4.12597          | -3.78814          | 0.337824 | 0.168912 | -3.95706 | -3.95706        | 3.957056 |
| Configure5  | -4.21355          | -3.85886          | 0.354688 | 0.177344 | -4.03621 | -4.03621        | 4.036208 |
| Configure6  | -4.31582          | -3.95787          | 0.357952 | 0.178976 | -4.13685 | -4.13685        | 4.136848 |
| Configure7  | -4.12597          | -3.78814          | 0.337824 | 0.168912 | -3.95706 | -3.95706        | 3.957056 |
| Configure8  | -4.19098          | -3.82269          | 0.368288 | 0.184144 | -4.00683 | -4.00683        | 4.006832 |
| Configure9  | -4.57803          | -4.16269          | 0.415344 | 0.207672 | -4.37036 | -4.37036        | 4.37036  |
| Configure10 | -4.33541          | -3.96086          | 0.374544 | 0.187272 | -4.14814 | -4.14814        | 4.148136 |



**Table S4** energy of the highest occupied molecular orbital ( $E_{\text{HOMO}}$ ), energy of the lowest unoccupied molecular orbital ( $E_{\text{LUMO}}$ ), the molecular orbital energy gap,  $E_g$ , Chemical hardness ( $\eta$ ) and chemical potential ( $\mu$ ), Fermi level energy and work function ( $\Phi$ ) in terms of eV computed at CAM-B3LYP

|             | $E_{\text{HOMO}}$ | $E_{\text{LUMO}}$ | $E_g$   | $\eta$  | $\mu$   | $E_{\text{FL}}$ | $\Phi$ |
|-------------|-------------------|-------------------|---------|---------|---------|-----------------|--------|
| SiCNT       | -4.9865           | -3.0507           | 1.9358  | 0.9679  | -4.0186 | -4.0186         | 4.0186 |
| Configure1  | -4.5247           | -3.34043          | 1.18428 | 0.59214 | -3.9325 | -3.9325         | 3.9325 |
| Configure2  | -5.071            | -2.9387           | 2.1327  | 1.0663  | -4.0050 | -4.0050         | 4.0050 |
| Configure3  | -5.3769           | -2.8685           | 2.5084  | 1.2542  | -4.1227 | -4.1227         | 4.1227 |
| Configure4  | -4.9871           | -3.0319           | 1.9551  | 0.9776  | -4.0095 | -4.0095         | 4.0095 |
| Configure5  | -4.9795           | -3.0540           | 1.9255  | 0.9627  | -4.0167 | -4.0167         | 4.0167 |
| Configure6  | -5.2085           | -3.0910           | 2.1175  | 1.0587  | -4.1497 | -4.1497         | 4.1497 |
| Configure7  | -4.8875           | -2.9716           | 1.9159  | 0.9579  | -3.9295 | -3.9295         | 3.9295 |
| Configure8  | -5.0377           | -3.0665           | 1.9712  | 0.9856  | -4.0521 | -4.0521         | 4.0521 |
| Configure9  | -5.4084           | -3.0567           | 2.3517  | 1.1758  | -4.2356 | -4.2356         | 4.2356 |
| Configure10 | -5.0652           | -3.1609           | 1.9043  | 0.9521  | -4.1130 | -4.1130         | 4.1130 |

**Table S5** The geometrical parameters (bond lengths (R) is in Å), adsorption ( $E_{ad}$ ) calculated at the CAM-B3LYP-D/6-31G\* level

|                 | SiCNT(7,0) | SiCNT (6,0) | CS <sub>2</sub> -(7,0)SiCNT | CS <sub>2</sub> -(6,0)SiCNT |
|-----------------|------------|-------------|-----------------------------|-----------------------------|
| C2-Si1          | 1.82546    | 1.77797     | 1.82392                     | 1.80065                     |
| C8-Si7          | 1.82326    | 1.77742     | 1.82268                     | 1.79939                     |
| C14-Si9         | 1.82409    | 1.77927     | 1.82372                     | 1.80074                     |
| C6-Si5          | 1.76341    | 1.78844     | 1.76409                     | 1.77632                     |
| C4-Si3          | 1.76503    | 1.78819     | 1.76553                     | 1.77734                     |
| C10-Si11        | 1.76527    | 1.78961     | 1.76545                     | 1.77845                     |
| C12-Si13        | 1.76390    | 1.78904     | 1.76427                     | 1.77763                     |
| C=S             | .....      | .....       | 1.5504                      | 1.55293                     |
| E <sub>ad</sub> |            |             | -25.1225                    | -27.0306                    |
